# Supplementary material for: Glioblastomas acquire myeloid-affiliated transcriptional programs via epigenetic immunoediting to elicit immune evasion
Source: PubMed Central journal article supplement — Cell. 2021 Apr 29;184(9):2454–2470.e26. doi: 10.1016/j.cell.2021.03.023 (PMC8099351; doi:10.1016/j.cell.2021.03.023), 2021-04-29
Supplement: mmc1.pdf [file mmc1.pdf]

**Supplemental information**

**Glioblastomas acquire myeloid-affiliated  
transcriptional programs via epigenetic  
immunoediting to elicit immune evasion**

**Ester Gangoso, Benjamin Southgate, Leanne Bradley, Stefanie Rus, Felipe Galvez-Cancino, Niamh McGivern, Esra Güç, Chantriolnt-Andreas Kapourani, Adam Byron, Kirsty M. Ferguson, Neza Alfazema, Gillian Morrison, Vivien Grant, Carla Blin, IengFong Sou, Maria Angeles Marques-Torrejon, Lucia Conde, Simona Parrinello, Javier Herrero, Stephan Beck, Sebastian Brandner, Paul M. Brennan, Paul Bertone, Jeffrey W. Pollard, Sergio A. Quezada, Duncan Sproul, Margaret C. Frame, Alan Serrels, and Steven M. Pollard**

**Table S1. sgRNA & crRNA oligonucleotide sequences used for knockout gene targeting and reporter line creation, Related to STAR methods.**

| Gene         | Species            | Oligo Type | ID                        | Oligo sequence (5' to 3')                                                                                                                                                                                                                                                                                                                                                                                                                                                                                                                                                                                                                                                                                                                                                                                                                                                                                                                                                                                                                                                                                                                                                                                                                                                                                                                                                                                                                                                                                   |
|--------------|--------------------|------------|---------------------------|-------------------------------------------------------------------------------------------------------------------------------------------------------------------------------------------------------------------------------------------------------------------------------------------------------------------------------------------------------------------------------------------------------------------------------------------------------------------------------------------------------------------------------------------------------------------------------------------------------------------------------------------------------------------------------------------------------------------------------------------------------------------------------------------------------------------------------------------------------------------------------------------------------------------------------------------------------------------------------------------------------------------------------------------------------------------------------------------------------------------------------------------------------------------------------------------------------------------------------------------------------------------------------------------------------------------------------------------------------------------------------------------------------------------------------------------------------------------------------------------------------------|
| <i>Trp53</i> | <i>M. musculus</i> | sgRNA      | Trp53_L                   | GCTGGCAGAATAGCTTATTG                                                                                                                                                                                                                                                                                                                                                                                                                                                                                                                                                                                                                                                                                                                                                                                                                                                                                                                                                                                                                                                                                                                                                                                                                                                                                                                                                                                                                                                                                        |
| <i>Trp53</i> | <i>M. musculus</i> | sgRNA      | Trp53_R                   | GAGCGCAAAGAGAGGTACGC                                                                                                                                                                                                                                                                                                                                                                                                                                                                                                                                                                                                                                                                                                                                                                                                                                                                                                                                                                                                                                                                                                                                                                                                                                                                                                                                                                                                                                                                                        |
| <i>Pten</i>  | <i>M. musculus</i> | sgRNA      | Pten_L                    | GGTTTGATAAGTTCTAGCTG                                                                                                                                                                                                                                                                                                                                                                                                                                                                                                                                                                                                                                                                                                                                                                                                                                                                                                                                                                                                                                                                                                                                                                                                                                                                                                                                                                                                                                                                                        |
| <i>Pten</i>  | <i>M. musculus</i> | sgRNA      | Pten_R                    | GTAATACGTTCTTCATACC                                                                                                                                                                                                                                                                                                                                                                                                                                                                                                                                                                                                                                                                                                                                                                                                                                                                                                                                                                                                                                                                                                                                                                                                                                                                                                                                                                                                                                                                                         |
| <i>Nf1</i>   | <i>M. musculus</i> | sgRNA      | Nf1_L                     | TCATCATCACATCTTCGGAT                                                                                                                                                                                                                                                                                                                                                                                                                                                                                                                                                                                                                                                                                                                                                                                                                                                                                                                                                                                                                                                                                                                                                                                                                                                                                                                                                                                                                                                                                        |
| <i>Nf1</i>   | <i>M. musculus</i> | sgRNA      | Nf1_R                     | TCGGCTGCTTTGGAACAATC                                                                                                                                                                                                                                                                                                                                                                                                                                                                                                                                                                                                                                                                                                                                                                                                                                                                                                                                                                                                                                                                                                                                                                                                                                                                                                                                                                                                                                                                                        |
| <i>Irf8</i>  | <i>M. musculus</i> | sgRNA      | Irf8_L                    | CCCGCCGTTCCGGTCACACA                                                                                                                                                                                                                                                                                                                                                                                                                                                                                                                                                                                                                                                                                                                                                                                                                                                                                                                                                                                                                                                                                                                                                                                                                                                                                                                                                                                                                                                                                        |
| <i>Irf8</i>  | <i>M. musculus</i> | sgRNA      | Irf8_R                    | CGGGGACAATTCGGTAAACT                                                                                                                                                                                                                                                                                                                                                                                                                                                                                                                                                                                                                                                                                                                                                                                                                                                                                                                                                                                                                                                                                                                                                                                                                                                                                                                                                                                                                                                                                        |
| <i>Irf8</i>  | <i>M. musculus</i> | sgRNA      | Irf8_E6_L                 | CCGTAGTAGAAGCTGATGAC                                                                                                                                                                                                                                                                                                                                                                                                                                                                                                                                                                                                                                                                                                                                                                                                                                                                                                                                                                                                                                                                                                                                                                                                                                                                                                                                                                                                                                                                                        |
| <i>Irf8</i>  | <i>M. musculus</i> | sgRNA      | Irf8_E6_R                 | GCAGTAGCACGCCACGTTCC                                                                                                                                                                                                                                                                                                                                                                                                                                                                                                                                                                                                                                                                                                                                                                                                                                                                                                                                                                                                                                                                                                                                                                                                                                                                                                                                                                                                                                                                                        |
| <i>Irf8</i>  | <i>M. musculus</i> | crRNA      | Irf8-p2A-mCherry Reporter | GAAGTGCCATTCCGCCTGACCTGATTGGAGGACCTG<br>TGGTGGAGGATGGCCCCAGTTCCCCTCCACCTTGAT<br>TCTGACTTTGCACATGGCCCTTGCAGGTAGAGCAGCT<br>GTATGCCAGGCAGCTGGTGGAGGAAGCGGGCAAGA<br>GCTGCGGTGCTGGCTCCCTGATGCCAGCCCTGGAGG<br>AGCCCCAGCCGGACCAGGCTTCCGCATGTTCCGG<br>ATATCTGTACCTCACACCAGAGACCCTTTTTTAGAGAA<br>AATCAACAGATCACCGTCGGATCCGGCGCAACAAACT<br>TCTCTCTGCTGAAACAAGCCGGAGATGTCAAGAGAA<br>TCCTGGACCGATGGTGAGCAAGGGCGAGGAGGATAA<br>CATGGCCATCATCAAGGAGTTCATGCGCTTCAAGGTG<br>CACATGGAGGGCTCCGTGAACGGCCACGAGTTCGAG<br>ATCGAGGGCGAGGGCGAGGGCCGCCCTACGAGGG<br>CACCCAGACCGCCAAGCTGAAGGTGACCAAGGGTGG<br>CCCCCTGCCCTTCGCCTGGGACATCCTGTCCCCTCA<br>GTTTCATGTACGGCTCCAAGGCCTACGTGAAGCACCC<br>CGCCGACATCCCCGACTACTTGAAGCTGTCTTCCCC<br>GAGGGCTTCAAGTGGGAGCGCGTGATGAACTTCGAG<br>GACGGCGGCGTGGTGACCGTGACCCAGGACTCCTC<br>CCTGCAGGACGGCGAGTTCATCTACAAGGTGAAGCT<br>GCGCGGCACCAACTTCCCCTCCGACGGCCCCGTAAT<br>GCAGAAGAAGACCATGGGCTGGGAGGCCTCCTCCGA<br>GCGGATGTACCCCGAGGACGGCGCCCTGAAGGGCG<br>AGATCAAGCAGAGGCTGAAGCTGAAGGACGGCGGCC<br>ACTACGACGCTGAGGTCAAGACCACCTACAAGGCCA<br>AGAAGCCCCTGCAGCTGCCCGGCGCCTACAACGTCA<br>ACATCAAGTTGGACATCACCTCCCACAACGAGGACTA<br>CACCATCGTGGAACAGTACGAACGCGCCGAGGGCCG<br>CCACTCCACCGCGGCATGGACGAGCTGTACAAGTA<br>AGCCTCAGTCCGGCCAGCCCACCTCGCCTGAGCTCA<br>AGCTTCAAGAGTCTGTGACTAAGAGAATTCCGAAAGG<br>ATGTGGAGCCCTCTGACTGGGGTGGGCGGGTGTCTC<br>CCAAGGGGCTCCGGAAGCCCACAGAGGGATGCGC<br>TCCTGCTCAGGCAGGTGTCAGAAGCTTGCAGGGGCT<br>GTGGCCGCAACCTGTGATTAAGCATTCTTTCTCTGC<br>GTTTCCCCCTTCACTAATGGCTGGCCTTAGGCTA<br>GGTGGAGGCTCAGTG |

**Table S5. Primer sequences used for plasmid construction, *Related to STAR Methods.***

| <b>Primer Name</b>   | <b>Sequence</b>                                        |
|----------------------|--------------------------------------------------------|
| hEGFRvIII_Fwd        | ATCACAAAGTTTGTACAATGCGACCCTCCGGGACGGCC                 |
| hEGFRvIII_Rev        | CACCACTTTGTACATCATGCTCCAATAAATTCCT                     |
| hPDGFRa_Fwd          | GGGACAAGTTTGTACAAAAAAGCAGGCTTCACCATGGGGACTTCCCATCCGGCG |
| hPDGFRa_Rev          | GGGACCACTTTGTACAAGAAAGCTGGGTCTTACAGGAAGCTGTCTTCCACCAGG |
| 3FLAG-LUC-2A-GFP Fwd | GGGACAAGTTTGTACAAAAAAGCAGGCTTCGCCACCATGGACTACAAAGA     |
| 3FLAG-LUC-2A-GFP Rev | GGGACCACTTTGTACAAGAAAGCTGGGTTTTACTTGTACAGCTCGTCCA      |

**Table S6. Primer sequences used for PCR genotyping, *Related to STAR Methods.***

| <b>Name</b>        | <b>Sequence</b>          |
|--------------------|--------------------------|
| Trp53_Fwd          | ACAAAAACAGCCCAGTGGAG     |
| Trp53_Rev          | AAAGACCTGGCAACCTGCTA     |
| Pten_BigDel_Fwd    | TGGGATTATCTTTTTGCAACAGT  |
| Pten_BigDel_Rev    | GGCCTTGTCTTTGTTTGCTT     |
| Pten_gRNA L_Fwd    | TGGGATTATCTTTTTGCAACAGT  |
| Pten_gRNA L_Rev    | TACACCAGTCCGTCCTTTC      |
| Pten_gRNA R_Fwd    | TCCATTTCTTTTCTGTTTAGGACA |
| Pten_gRNA R_Rev    | CTTGTCATTATCTGCACGCTCT   |
| Nf1_BigDel_Fwd     | CACACGTGCACTAGGTTTGT     |
| Nf1_BigDel_Rev     | ATGCATGTGAATCTGCGCTT     |
| Nf1_gRNA L_Fwd     | CACTCTGTTTGATTCCCGGC     |
| Nf1_gRNA L_Rev     | GGACAGACCGGAGTAAACCA     |
| Nf1_gRNA R_Fwd     | CCCCTCCTTTGCAATCACAG     |
| Nf1_gRNA R_Rev     | CAGAGCTCACGTAGACCAGT     |
| Irf8_gRNA_L_Fwd    | TGAAAGATTTGCTTTCTTTCCAAG |
| Irf8_gRNA_L_Rev    | GTACGCAGGAGGCTTTAC       |
| Irf8_E6_gRNA_L_Fw  | CCTGTGCTCTTGGCTCCCACAG   |
| Irf8_E6_gRNA_R_Rev | AGCGAGGTGACTTGGTACTGAC   |

**Table S7. qRT PCR TaqMan assays, *Related to STAR Methods.***

| <b>Gene</b> | <b>Source</b> | <b>Identifier</b> |
|-------------|---------------|-------------------|
| Gapdh       | Thermo Fisher | Mm99999915_g1     |
| H2-Ab1      | Thermo Fisher | Mm00439216_m1     |
| H2-Q7       | Thermo Fisher | Mm00843895_s1     |
| H2-Q10      | Thermo Fisher | Mm01275264_g1     |
| Ifi47       | Thermo Fisher | Mm01950217_u1     |
| Ifih1       | Thermo Fisher | Mm00459183_m1     |
| Irf8        | Thermo Fisher | Mm00492567_m1     |
